# Supplementary material for: Synthesis of blocked waterborne polyurethane polymeric dyes with tailored molecular weight: thermal, rheological and printing properties
Source: Royal Society of Chemistry journal article supplement (doi:10.1039/c6ra14344j), 2016-01-01
Supplement: c6ra14344j1.pdf [file c6ra14344j1.pdf]

## SUPPORTING INFORMATION

### **Synthesis of Blocked Waterborne Polyurethane Polymeric Dyes with Tailored Molecular Weight: Thermal, Rheological and Printing Properties**

Haiyan Mao<sup>a,b</sup>, Youjiang Wang<sup>b</sup>, Donggang Yao<sup>b</sup>, Chaoxia Wang<sup>\*,a</sup>, Shiguo Sun<sup>c</sup>

<sup>a</sup> *Key Laboratory of Eco-Textile, Ministry of Education, School of Textiles and Clothing, Jiangnan*

*University, Wuxi 214122, China*

<sup>b</sup> *School of Materials Science & Engineering, Georgia Institute of Technology, Atlanta, GA*

*30332-0295, USA*

<sup>c</sup> *College of Sciences Northwest A&F University, Yangling, Shaanxi 712100, China*

\*Corresponding author, email: wangchaoxia@sohu.com

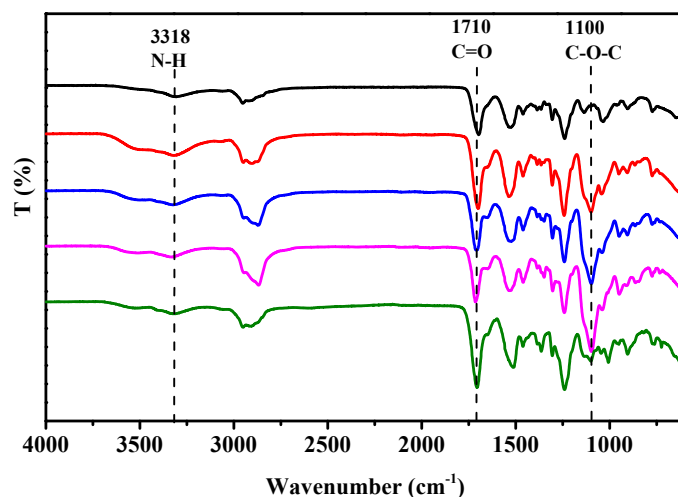

Fig.S1 FTIR spectra of BWPU

As shown in Fig.S1, the absorptions at 3318  $\text{cm}^{-1}$ , 1710  $\text{cm}^{-1}$ , 1304  $\text{cm}^{-1}$  and 1240  $\text{cm}^{-1}$  are ascribed to the stretching band of N-H, C=O, C-O and N-C in the urethane group (-NH-COO-). The appearance of absorption around 1100  $\text{cm}^{-1}$  is assigned to the stretching vibration of C-O-C in the PEG soft segments (except BWPU-PEG0). Additionally, the weak peak at 1645  $\text{cm}^{-1}$  is associated with the stretching vibration of the C=O group in -N-CO-NH-, and the strong bands near 950  $\text{cm}^{-1}$  and 774  $\text{cm}^{-1}$  due to C-H in-plane and out-plane bending vibrations in anthraquinone ring confirms that the chromophore has been successfully introduced into polyurethane chains. Furthermore, the absence of characteristic stretching vibration at 2270  $\text{cm}^{-1}$  indicates that NCO groups have been effectively blocked by the blocking agent. All the above typical peaks confirm the formation of polymeric dyes based on blocked waterborne polyurethanes.
